# Supplementary material for: Volumetric CT Texture Analysis of Intrahepatic Mass-Forming Cholangiocarcinoma for the Prediction of Postoperative Outcomes: Fully Automatic Tumor Segmentation Versus Semi-Automatic Segmentation
Source: PubMed Central journal article supplement — Korean J Radiol. 2021 Jul 26;22(11):1797–808. doi: 10.3348/kjr.2021.0055 (PMC8546140; doi:10.3348/kjr.2021.0055), 2021-07-26
Supplement: kjr-22-1797-s002.pdf [file kjr-22-1797-s002.pdf]

**Supplementary Table 2. Texture Analysis Results of Semi-Automatic Segmentation and Intraobserver Reproducibility**

|                             | Texture Parameters, Mean $\pm$ SD |                   | Intraobserver Reproducibility, ICC (95% CI) |                     |
|-----------------------------|-----------------------------------|-------------------|---------------------------------------------|---------------------|
|                             | 1st Trial                         | 2nd Trial         | All Patients (n = 89)                       | Subgroup (n = 55)*  |
| Volume                      | 106.6 $\pm$ 281.2                 | 107.6 $\pm$ 278.9 | 0.995 (0.992–0.997)                         | 0.995 (0.992–0.997) |
| Diameter                    | 60.0 $\pm$ 32.5                   | 60.4 $\pm$ 33.1   | 0.982 (0.972–0.988)                         | 0.980 (0.964–0.988) |
| First-order                 |                                   |                   |                                             |                     |
| Mean                        | 66.3 $\pm$ 21.1                   | 66.1 $\pm$ 21.5   | 0.966 (0.948–0.978)                         | 0.946 (0.908–0.989) |
| Variance                    | 442.9 $\pm$ 270.2                 | 435.4 $\pm$ 257.4 | 0.945 (0.916–0.964)                         | 0.932 (0.884–0.960) |
| Energy (x 10 <sup>8</sup> ) | 5.5 $\pm$ 13.0                    | 5.4 $\pm$ 12.3    | 0.960 (0.939–0.974)                         | 0.954 (0.921–0.973) |
| Entropy                     | 1.8 $\pm$ 0.3                     | 1.8 $\pm$ 0.3     | 0.952 (0.927–0.968)                         | 0.926 (0.873–0.957) |
| Skewness                    | -0.1 $\pm$ 0.6                    | -0.1 $\pm$ 0.5    | 0.847 (0.766–0.899)                         | 0.796 (0.649–0.881) |
| Kurtosis                    | 5.1 $\pm$ 6.1                     | 5.0 $\pm$ 5.7     | 0.786 (0.675–0.860)                         | 0.803 (0.661–0.885) |
| Uniformity                  | 0.4 $\pm$ 0.1                     | 0.4 $\pm$ 0.1     | 0.963 (0.944–0.976)                         | 0.938 (0.894–0.964) |
| Second-order                |                                   |                   |                                             |                     |
| GLCM IDM                    | 0.7 $\pm$ 0.1                     | 0.7 $\pm$ 0.1     | 0.994 (0.991–0.996)                         | 0.989 (0.982–0.994) |
| GLCM contrast               | 0.7 $\pm$ 0.3                     | 0.7 $\pm$ 0.3     | 0.993 (0.990–0.996)                         | 0.991 (0.985–0.995) |
| GLCM correlation            | 0.5 $\pm$ 0.1                     | 0.5 $\pm$ 0.1     | 0.936 (0.902–0.958)                         | 0.908 (0.843–0.947) |
| GLCM sum average            | 12.3 $\pm$ 8.0                    | 12.7 $\pm$ 7.2    | 0.838 (0.754–0.894)                         | 0.882 (0.798–0.931) |
| GLCM diff average           | 0.6 $\pm$ 0.1                     | 0.6 $\pm$ 0.1     | 0.994 (0.991–0.996)                         | 0.991 (0.984–0.995) |
| GLCM sum entropy            | 2.5 $\pm$ 0.4                     | 2.5 $\pm$ 0.4     | 0.949 (0.922–0.966)                         | 0.921 (0.865–0.954) |
| GLCM diff entropy           | 1.3 $\pm$ 0.2                     | 1.3 $\pm$ 0.2     | 0.991 (0.987–0.994)                         | 0.987 (0.977–0.992) |
| Shape                       |                                   |                   |                                             |                     |
| Compactness1                | 0.0 $\pm$ 0.0                     | 0.0 $\pm$ 0.0     | 0.815 (0.719–0.879)                         | 0.545 (0.226–0.733) |
| Compactness2                | 0.2 $\pm$ 0.1                     | 0.2 $\pm$ 0.1     | 0.777 (0.661–0.854)                         | 0.767 (0.601–0.864) |
| Elongation                  | 0.8 $\pm$ 0.1                     | 0.8 $\pm$ 0.1     | 0.854 (0.778–0.904)                         | 0.880 (0.795–0.930) |
| Flatness                    | 0.6 $\pm$ 0.1                     | 0.6 $\pm$ 0.1     | 0.897 (0.843–0.932)                         | 0.916 (0.855–0.951) |
| Sphericity                  | 0.6 $\pm$ 0.1                     | 0.6 $\pm$ 0.1     | 0.826 (0.735–0.886)                         | 0.821 (0.694–0.896) |

\*Subgroup analysis was performed after excluding tumors with ill-defined margins according to an independent review by another radiologist (5 years of abdominal CT experience). CI = confidence interval, diff = difference, GLCM = Gray-Level Co-occurrence Matrix, ICC = intraclass correlation coefficient, IDM = inverse difference moment, SD = standard deviation
