# Supplementary material for: Volumetric CT Texture Analysis of Intrahepatic Mass-Forming Cholangiocarcinoma for the Prediction of Postoperative Outcomes: Fully Automatic Tumor Segmentation Versus Semi-Automatic Segmentation
Source: PubMed Central journal article supplement — Korean J Radiol. 2021 Jul 26;22(11):1797–808. doi: 10.3348/kjr.2021.0055 (PMC8546140; doi:10.3348/kjr.2021.0055), 2021-07-26
Supplement: kjr-22-1797-s003.pdf [file kjr-22-1797-s003.pdf]

**Supplementary Table 3. Texture Analysis Results of Fully Automatic Segmentation and Intraobserver Reproducibility**

|                             | Texture Parameters, Mean $\pm$ SD |                   | Intraobserver Reproducibility, ICC (95% CI) |                     |
|-----------------------------|-----------------------------------|-------------------|---------------------------------------------|---------------------|
|                             | 1st Trial                         | 2nd Trial         | All patients (n = 89)                       | Subgroup (n = 55)*  |
| Volume                      | 125.7 $\pm$ 287.6                 | 121.5 $\pm$ 278.1 | 0.997 (0.996–0.998)                         | 0.998 (0.997–0.999) |
| Diameter                    | 62.9 $\pm$ 37.2                   | 62.8 $\pm$ 35.5   | 0.960 (0.939–0.974)                         | 0.968 (0.945–0.981) |
| First-order                 |                                   |                   |                                             |                     |
| Mean                        | 64.6 $\pm$ 23.0                   | 64.8 $\pm$ 23.1   | 0.989 (0.983–0.993)                         | 0.989 (0.981–0.993) |
| Variance                    | 492.4 $\pm$ 287.0                 | 486.2 $\pm$ 336.1 | 0.932 (0.896–0.955)                         | 0.923 (0.869–0.955) |
| Energy (x 10 <sup>8</sup> ) | 7.3 $\pm$ 18.4                    | 7.2 $\pm$ 18.2    | 0.997 (0.996–0.998)                         | 0.998 (0.997–0.999) |
| Entropy                     | 1.8 $\pm$ 0.3                     | 1.8 $\pm$ 0.3     | 0.953 (0.929–0.969)                         | 0.963 (0.937–0.978) |
| Skewness                    | -0.1 $\pm$ 0.8                    | -0.1 $\pm$ 0.8    | 0.948 (0.921–0.966)                         | 0.942 (0.900–0.966) |
| Kurtosis                    | 6.0 $\pm$ 7.2                     | 6.2 $\pm$ 7.2     | 0.983 (0.974–0.989)                         | 0.979 (0.963–0.988) |
| Uniformity                  | 0.3 $\pm$ 0.1                     | 0.4 $\pm$ 0.8     | 0.950 (0.924–0.967)                         | 0.968 (0.964–0.982) |
| Second-order                |                                   |                   |                                             |                     |
| GLCM IDM                    | 0.7 $\pm$ 0.1                     | 0.7 $\pm$ 0.5     | 0.993 (0.989–0.995)                         | 0.994 (0.990–0.997) |
| GLCM contrast               | 0.8 $\pm$ 0.3                     | 0.8 $\pm$ 0.3     | 0.992 (0.988–0.995)                         | 0.993 (0.988–0.996) |
| GLCM correlation            | 0.5 $\pm$ 0.2                     | 0.5 $\pm$ 0.2     | 0.934 (0.900–0.957)                         | 0.949 (0.912–0.970) |
| GLCM sum average            | 13.8 $\pm$ 9.8                    | 13.3 $\pm$ 9.5    | 0.959 (0.937–0.973)                         | 0.956 (0.925–0.974) |
| GLCM diff average           | 0.6 $\pm$ 0.1                     | 0.6 $\pm$ 0.1     | 0.993 (0.990–0.995)                         | 0.995 (0.991–0.997) |
| GLCM sum entropy            | 2.5 $\pm$ 0.4                     | 2.5 $\pm$ 0.4     | 0.950 (0.924–0.967)                         | 0.963 (0.936–0.978) |
| GLCM diff entropy           | 1.3 $\pm$ 0.2                     | 1.3 $\pm$ 0.2     | 0.989 (0.983–0.993)                         | 0.990 (0.982–0.994) |
| Shape                       |                                   |                   |                                             |                     |
| Compactness1                | 0.0 $\pm$ 0.0                     | 0.0 $\pm$ 0.0     | 0.665 (0.492–0.779)                         | 0.522 (0.177–0.722) |
| Compactness2                | 0.2 $\pm$ 0.1                     | 0.2 $\pm$ 0.1     | 0.674 (0.506–0.786)                         | 0.738 (0.849–0.847) |
| Elongation                  | 0.8 $\pm$ 0.1                     | 0.8 $\pm$ 0.1     | 0.812 (0.714–0.877)                         | 0.856 (0.752–0.916) |
| Flatness                    | 0.6 $\pm$ 0.1                     | 0.6 $\pm$ 0.1     | 0.601 (0.390–0.738)                         | 0.830 (0.709–0.901) |
| Sphericity                  | 0.6 $\pm$ 0.1                     | 0.6 $\pm$ 0.1     | 0.655 (0.476–0.773)                         | 0.658 (0.411–0.801) |

\*Subgroup analysis was performed after excluding tumors with ill-defined margins according to an independent review by another radiologist (5 years of abdominal CT experience). CI = confidence interval, diff = difference, GLCM = Gray-Level Co-occurrence Matrix, ICC = intraclass correlation coefficient, IDM = inverse difference moment, SD = standard deviation
