# Supplementary material for: Volumetric CT Texture Analysis of Intrahepatic Mass-Forming Cholangiocarcinoma for the Prediction of Postoperative Outcomes: Fully Automatic Tumor Segmentation Versus Semi-Automatic Segmentation
Source: PubMed Central journal article supplement — Korean J Radiol. 2021 Jul 26;22(11):1797–808. doi: 10.3348/kjr.2021.0055 (PMC8546140; doi:10.3348/kjr.2021.0055), 2021-07-26
Supplement: kjr-22-1797-s004.pdf [file kjr-22-1797-s004.pdf]

**Supplementary Table 4. Interobserver Reproducibility of Texture Analysis Results**

| Segmentation Method | Interobserver Agreement (Semi-Automatic) | Interobserver Agreement (Fully Automatic) |
|---------------------|------------------------------------------|-------------------------------------------|
| Volume              | 0.997 (0.988–0.998)                      | 0.909 (0.811–0.957)                       |
| Diameter            | 0.970 (0.932–0.986)                      | 0.858 (0.702–0.932)                       |
| First-order         |                                          |                                           |
| Mean                | 0.991 (0.973–0.996)                      | 0.971 (0.940–0.986)                       |
| Variance            | 0.964 (0.913–0.984)                      | 0.923 (0.839–0.963)                       |
| Energy              | 0.995 (0.988–0.998)                      | 0.868 (0.724–0.937)                       |
| Entropy             | 0.939 (0.855–0.973)                      | 0.900 (0.790–0.952)                       |
| Skewness            | 0.956 (0.909–0.979)                      | 0.746 (0.461–0.880)                       |
| Kurtosis            | 0.962 (0.920–0.982)                      | 0.177 (-0.773–0.613)                      |
| Uniformity          | 0.921 (0.819–0.964)                      | 0.849 (0.684–0.928)                       |
| Second-order        |                                          |                                           |
| GLCM IDM            | 0.994 (0.986–0.997)                      | 0.981 (0.961–0.991)                       |
| GLCM contrast       | 0.995 (0.989–0.998)                      | 0.984 (0.967–0.992)                       |
| GLCM correlation    | 0.885 (0.732–0.948)                      | 0.684 (0.342– 0.849)                      |
| GLCM sum average    | 0.888 (0.766–0.947)                      | 0.710 (0.384–0.863)                       |
| GLCM diff average   | 0.995 (0.988–0.998)                      | 0.984 (0.966–0.992)                       |
| GLCM sum entropy    | 0.922 (0.815–0.965)                      | 0.856 (0.699–0.931)                       |
| GLCM diff entropy   | 0.995 (0.986–0.998)                      | 0.977 (0.951–0.989)                       |
| Shape               |                                          |                                           |
| Compactness1        | 0.502 (-0.001– 0.760)                    | 0.321 (-0.429–0.677)                      |
| Compactness2        | 0.521 (0.012–0.771)                      | 0.208 (-0.671–0.623)                      |
| Elongation          | 0.001 (-0.167–0.235)                     | 0.818 (0.615–0.914)                       |
| Flatness            | 0.888 (0.766–0.946)                      | 0.653 (0.263–0.836)                       |
| Sphericity          | 0.494 (-0.019–0.755)                     | 0.355 (-0.358–0.693)                      |

Data are intraclass correlation coefficient values with 95% confidence interval in parentheses. Interobserver agreement of semi-automatic segmentation or fully-automatic segmentation was calculated between radiologist 1 and radiologist 2. diff = difference, GLCM = Gray-Level Co-occurrence Matrix, IDM = inverse difference moment
