# Supplementary material for: Volumetric CT Texture Analysis of Intrahepatic Mass-Forming Cholangiocarcinoma for the Prediction of Postoperative Outcomes: Fully Automatic Tumor Segmentation Versus Semi-Automatic Segmentation
Source: PubMed Central journal article supplement — Korean J Radiol. 2021 Jul 26;22(11):1797–808. doi: 10.3348/kjr.2021.0055 (PMC8546140; doi:10.3348/kjr.2021.0055), 2021-07-26
Supplement: kjr-22-1797-s005.pdf [file kjr-22-1797-s005.pdf]

**Supplementary Table 5. Subgroup Analysis (for 18 Tumors among Randomly Chosen 30 Tumors), Excluding Tumors with Ill-Defined Margins: Interobserver and Intraobserver Reproducibility of Texture Analysis Results of Eighteen Intrahepatic Mass-Forming Cholangiocarcinomas**

| Segmentation Method | Interobserver<br>(Semi-Automatic) | Interobserver<br>(Fully Automatic) | Intraobserver 1      | Intraobserver 2      |
|---------------------|-----------------------------------|------------------------------------|----------------------|----------------------|
| Volume              | 0.999 (0.995–1.000)               | 0.987 (0.964–0.995)                | 0.990 (0.974–0.996)  | 0.993 (0.982–0.998)  |
| Diameter            | 0.967 (0.914–0.988)               | 0.923 (0.797–0.971)                | 0.953 (0.874–0.982)  | 0.957 (0.887–0.984)  |
| First-order         |                                   |                                    |                      |                      |
| Mean                | 0.986 (0.960–0.995)               | 0.965 (0.906–0.987)                | 0.971 (0.923–0.989)  | 0.975 (0.823–0.993)  |
| Variance            | 0.978 (0.943–0.992)               | 0.899 (0.727–0.962)                | 0.888 (0.701–0.958)  | 0.894 (0.710–0.961)  |
| Energy              | 0.999 (0.997–1.000)               | 0.961 (0.894–0.986)                | 0.961 (0.898–0.985)  | 0.990 (0.974–0.996)  |
| Entropy             | 0.958 (0.890–0.984)               | 0.924 (0.796–0.972)                | 0.947 (0.852–0.981)  | 0.919 (0.742–0.971)  |
| Skewness            | 0.981 (0.950–0.993)               | 0.556 (-0.178–0.833)               | 0.408 (-0.679–0.783) | 0.667 (0.122–0.875)  |
| Kurtosis            | 0.969 (0.917–0.988)               | 0.091 (-1.461–0.661)               | 0.182 (-1.357–0.702) | 0.614 (-0.039–0.856) |
| Uniformity          | 0.937 (0.832–0.976)               | 0.911 (0.763–0.967)                | 0.943 (0.831–0.979)  | 0.884 (0.625–0.959)  |
| Second-order        |                                   |                                    |                      |                      |
| GLCM IDM            | 0.997 (0.993–0.999)               | 0.987 (0.965–0.995)                | 0.988 (0.966–0.995)  | 0.986 (0.964–0.995)  |
| GLCM contrast       | 0.996 (0.990–0.999)               | 0.976 (0.936–0.991)                | 0.974 (0.928–0.990)  | 0.993 (0.980–0.997)  |
| GLCM correlation    | 0.903 (0.746–0.963)               | 0.805 (0.479–0.927)                | 0.818 (0.372–0.938)  | 0.671 (0.107–0.878)  |
| GLCM sum average    | 0.875 (0.669–0.953)               | 0.501 (-0.329–0.813)               | 0.257 (-1.120–0.729) | 0.780 (0.432–0.917)  |
| GLCM diff average   | 0.997 (0.992–0.999)               | 0.985 (0.961–0.994)                | 0.986 (0.960–0.995)  | 0.995 (0.986–0.998)  |
| GLCM sum entropy    | 0.952 (0.872–0.982)               | 0.919 (0.784–0.970)                | 0.937 (0.812–0.978)  | 0.902 (0.666–0.967)  |
| GLCM diff entropy   | 0.997 (0.992–0.999)               | 0.976 (0.938–0.991)                | 0.975 (0.929–0.991)  | 0.993 (0.980–0.997)  |
| Shape               |                                   |                                    |                      |                      |
| Compactness1        | 0.223 (-0.413–0.647)              | 0.677 (0.110–0.881)                | 0.493 (-0.336–0.809) | 0.147 (-0.489–0.602) |
| Compactness2        | 0.240 (-0.393–0.657)              | 0.668 (0.085–0.877)                | 0.421 (-0.545–0.783) | 0.199 (-0.441–0.634) |
| Elongation          | 0.462 (-0.462–0.800)              | 0.905 (0.752–0.964)                | 0.563 (-0.219–0.839) | 0.590 (-0.142–0.849) |
| Flatness            | 0.916 (0.779–0.968)               | 0.945 (0.855–0.980)                | 0.690 (0.184–0.884)  | 0.675 (0.164–0.877)  |
| Sphericity          | 0.215 (-0.424–0.643)              | 0.681 (0.121–0.882)                | 0.517 (-0.265–0.818) | 0.130 (-0.509–0.592) |

Data are intraclass correlation coefficient values with 95% confidence interval in parentheses. Interobserver agreement of semi-automatic segmentation or fully-automatic segmentation was calculated between radiologist 1 and radiologist 2. Intraobserver 1 was calculated between semi-automatic and fully-automatic segmentation by radiologist 1. Intraobserver 2 was calculated between semi-automatic and fully-automatic segmentation by radiologist 2. diff = difference, GLCM = Gray-Level Co-occurrence Matrix, IDM = inverse difference moment
