# Supplementary material for: Volumetric CT Texture Analysis of Intrahepatic Mass-Forming Cholangiocarcinoma for the Prediction of Postoperative Outcomes: Fully Automatic Tumor Segmentation Versus Semi-Automatic Segmentation
Source: PubMed Central journal article supplement — Korean J Radiol. 2021 Jul 26;22(11):1797–808. doi: 10.3348/kjr.2021.0055 (PMC8546140; doi:10.3348/kjr.2021.0055), 2021-07-26
Supplement: kjr-22-1797-s006.pdf [file kjr-22-1797-s006.pdf]

**Supplementary Table 6. Pearson Correlation Coefficient and Multicollinearity Analysis of with Pathologic Size and Other Variables (Semi-Automatic Diameter, Semi-Automatic Volume, Full-Automatic Diameter, Full-Automatic Volume, ROI [2D] Area, and ROI [2D] Diameter)**

| Variables                                           | Pearson Correlation Coefficient |                       |                         |                       |                         |               |                   | Variation Inflation Factor |
|-----------------------------------------------------|---------------------------------|-----------------------|-------------------------|-----------------------|-------------------------|---------------|-------------------|----------------------------|
|                                                     | Pathologic Size                 | Semi-Automatic Volume | Semi-Automatic Diameter | Full-Automatic Volume | Full-Automatic Diameter | ROI (2D) Area | ROI (2D) Diameter |                            |
| Pathologic size                                     | N/A                             | 0.756                 | 0.916                   | 0.771                 | 0.837                   | 0.788         | 0.925             | N/A                        |
| Semi-automatic volume                               | 0.756                           | N/A                   | 0.764                   | 0.946                 | 0.729                   | 0.845         | 0.774             | 16.947                     |
| Semi-automatic diameter                             | 0.916                           | 0.764                 | N/A                     | 0.791                 | 0.882                   | 0.850         | 0.990             | 54.358                     |
| Full-automatic volume                               | 0.771                           | 0.946                 | 0.791                   | N/A                   | 0.838                   | 0.828         | 0.808             | 20.264                     |
| Full-automatic diameter                             | 0.837                           | 0.729                 | 0.882                   | 0.838                 | N/A                     | 0.811         | 0.894             | 9.250                      |
| ROI (2D) area                                       | 0.788                           | 0.845                 | 0.850                   | 0.828                 | 0.811                   | N/A           | 0.864             | 6.119                      |
| ROI (2D) diameter                                   | 0.925                           | 0.774                 | 0.990                   | 0.808                 | 0.894                   | 0.864         | N/A               | 62.094                     |
| <i>p</i> values for Pearson correlation coefficient |                                 |                       |                         |                       |                         |               |                   |                            |
| Pathologic size                                     | N/A                             | < 0.001               | < 0.001                 | < 0.001               | < 0.001                 | < 0.001       | < 0.001           |                            |
| Semi-automatic volume                               | < 0.001                         | N/A                   | < 0.001                 | < 0.001               | < 0.001                 | < 0.001       | < 0.001           |                            |
| Semi-automatic diameter                             | < 0.001                         | < 0.001               | N/A                     | < 0.001               | < 0.001                 | < 0.001       | < 0.001           |                            |
| Full-automatic volume                               | < 0.001                         | < 0.001               | < 0.001                 | N/A                   | < 0.001                 | < 0.001       | < 0.001           |                            |
| Full-automatic diameter                             | < 0.001                         | < 0.001               | < 0.001                 | < 0.001               | N/A                     | < 0.001       | < 0.001           |                            |
| ROI (2D) area                                       | < 0.001                         | < 0.001               | < 0.001                 | < 0.001               | < 0.001                 | N/A           | < 0.001           |                            |
| ROI (2D) diameter                                   | < 0.001                         | < 0.001               | < 0.001                 | < 0.001               | < 0.001                 | < 0.001       | N/A               |                            |

ROI = region of interest, 2D = two-dimensional
